# Supplementary material for: Spatial Characterization of Microbial Communities on Multi-Species Leafy Greens Grown Simultaneously in the Vegetable Production Systems on the International Space Station
Source: MDPI journal article supplement (doi:10.3390/life11101060), 2021-10-09
Supplement: s1 [file s1]

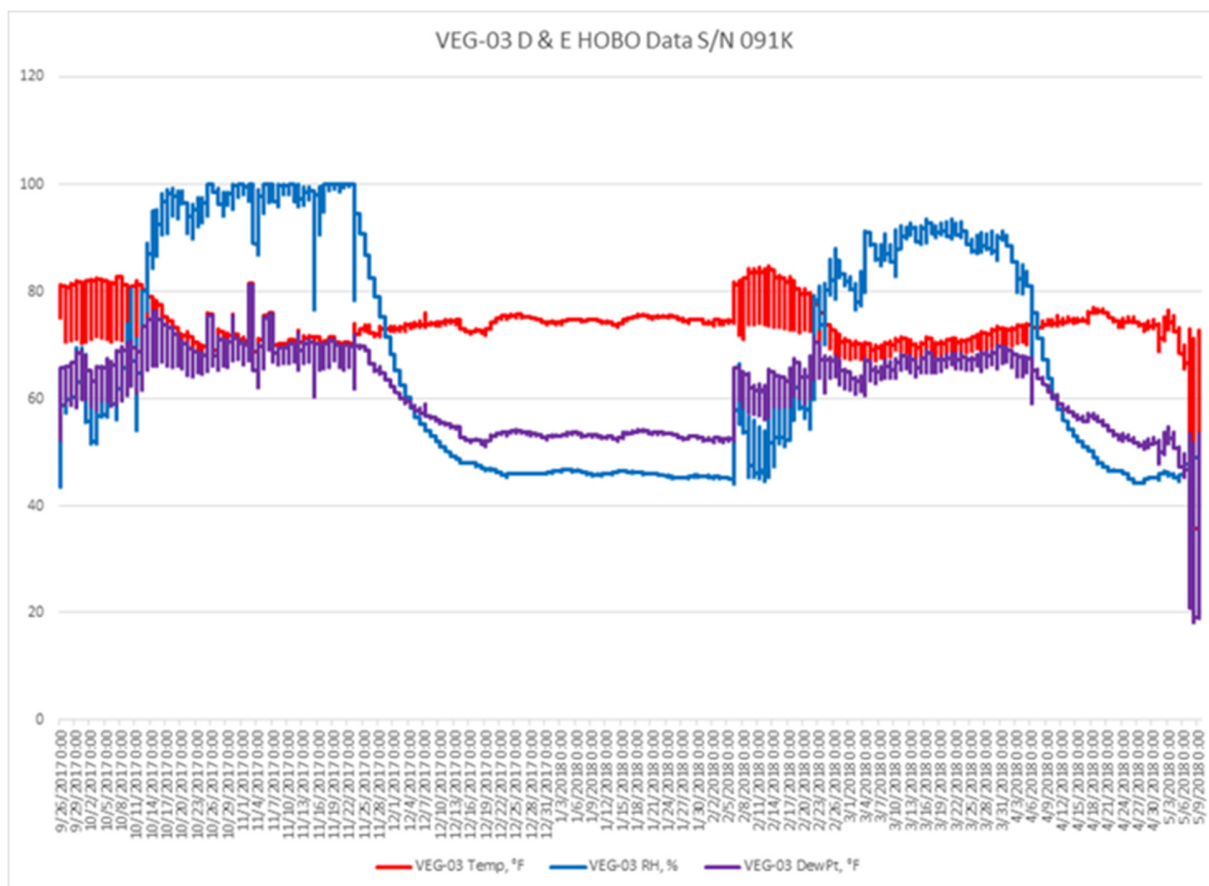

Figure S1. Veg-03 D and VEG-03 E HOBO data recording temperature and humidity. The first curves are VEG-03D, the second VEG-03E

Table S1. Water volume per plant from VEG-03 D, E and F combined.

|               | Total plant number | DAP30  | SD    | Final Harvest | SD    |
|---------------|--------------------|--------|-------|---------------|-------|
| Mizuna        | 6                  | 1143.3 | 122.9 | 2530.8        | 301.2 |
| Red Lettuce   | 6                  | 935.0  | 223.4 | 2162.5        | 475.1 |
| Green Lettuce | 4                  | 943.8  | 44.8  | 2058.8        | 131.0 |

Table S2. Shannon Index for Alpha Diversity for each sample recovered in VEG-03D. Evenness is calculated by Pielou's Evenness Index. Community diversity includes richness (number of species) and evenness. Evenness is defined as how close in number each species is or another measure of biodiversity which quantifies how equal the community is numerically quantified. The range is from 0 to 1 where a value close to 0 means the numbers are uneven. The closer to 1 the numbers of each species are closer together.

| VEG 03D         |               |           |          |
|-----------------|---------------|-----------|----------|
| Sample          | Shannon Index | # Species | Evenness |
| V03DGreen05-S3  | 1.865         | 695       | 0.284998 |
| V03DGreen05-S2  | 1.873         | 615       | 0.291671 |
| V03DGreen05-S1  | 1.867         | 755       | 0.281738 |
| V03DGreen05-W   | 0.99          | 501       | 0.159251 |
| V03DGreen05-R   | 1.898         | 716       | 0.288727 |
| Veg03DSw-8      | 0.996         | 661       | 0.153378 |
| Veg03DSw-7      | 1.365         | 639       | 0.211303 |
| Veg03DSw-6      | 0.757         | 377       | 0.127608 |
| Veg03DSw-5      | 1.463         | 683       | 0.224163 |
| Veg03DSw-4      | 0.889         | 768       | 0.133809 |
| Veg03DSw-3      | 0.965         | 762       | 0.14542  |
| Veg03DSw-2      | 0.925         | 736       | 0.140125 |
| Veg03DSw-1      | 0.886         | 795       | 0.132668 |
| FL-2F-Green-18  | 0.409         | 262       | 0.073451 |
| FL-2E-Green-05  | 0.344         | 137       | 0.069919 |
| FL-2D-Red-16    | 0.413         | 236       | 0.075588 |
| FL-2C-Red-03    | 0.346         | 170       | 0.06737  |
| FL-2B-Miz02     | 0.082         | 140       | 0.016594 |
| FL-2A-Miz14     | 0.084         | 160       | 0.016551 |
| FL-1F-Green-18  | 0.289         | 264       | 0.05183  |
| FL-1E-Green-05  | 0.351         | 247       | 0.063709 |
| FL-1D-Red-16    | 0.293         | 206       | 0.054994 |
| FL-1C-Red-03    | 0.29          | 215       | 0.053997 |
| FL-1B-Miz02     | 0.096         | 169       | 0.018714 |
| FL-1A-Miz14     | 0.293         | 158       | 0.057875 |
| Veg03DMiz2-W    | 1.47          | 422       | 0.243176 |
| Veg03DMiz2-S3   | 1.945         | 540       | 0.309144 |
| Veg03DMiz2-S2   | 1.735         | 405       | 0.288979 |
| Veg03DMiz2-S1   | 0.696         | 437       | 0.114475 |
| Veg03DMiz2-Root | 1.959         | 530       | 0.312297 |
| Red_0316_Wick   | 0.936         | 223       | 0.173103 |
| Red_0316_Soil_3 | 1.767         | 344       | 0.302535 |
| Red_0316_Soil_2 | 1.648         | 314       | 0.286639 |
| Red_0316_Soil_1 | 1.653         | 220       | 0.306473 |
| Red_0316_Root   | 1.666         | 325       | 0.288045 |
| Red_0303_Wick   | 1.657         | 360       | 0.28151  |
| Red_0303_Soil_3 | 1.791         | 404       | 0.29843  |
| Red_0303_Soil_2 | 1.801         | 342       | 0.308665 |
| Red_0303_Soil_1 | 1.666         | 413       | 0.276586 |
| Red_0303_Root   | 1.853         | 484       | 0.299737 |

Table S3. Shannon Index for Alpha Diversity for each sample recovered in VEG-03E.

Evenness is calculated by Pielou's Evenness Index. Community diversity includes richness (number of species) and evenness. Evenness is defined as how close in number each species is or another measure of biodiversity which quantifies how equal the community is numerically quantified. The range is from 0 to 1 where a value close to 0 means the numbers are uneven. The closer to 1 the numbers of each species are closer together.

| Sample               | VEG 03E       |           |          |
|----------------------|---------------|-----------|----------|
|                      | Shannon Index | # Species | Evenness |
| GMT_075_8_Plant      | 0.2           | 113       | 0.042307 |
| 23 GMT_075_7_Plant   | 0.121         | 81        | 0.027535 |
| 24 GMT_075_1_Plant   | 0.259         | 117       | 0.054387 |
| 25 GMT_075_13_Plant  | 0.115         | 80        | 0.026244 |
| 26 GMT_075_10_Plant  | 0.267         | 76        | 0.061652 |
| GMT_096_8_Plant      | 0.154         | 119       | 0.032223 |
| 16 GMT_096_7_Plant   | 0.152         | 104       | 0.032728 |
| 17 GMT_096_1_Plant   | 0.2           | 120       | 0.041776 |
| 18 GMT_096_17_Plant  | 0.437         | 136       | 0.088954 |
| 19 GMT_096_13_Plant  | 0.192         | 159       | 0.037878 |
| 096_SN01_Wick_P      | 2.116         | 474       | 0.343439 |
| 46 096_SN01_Soil_3_P | 1.523         | 333       | 0.262218 |
| 47 096_SN01_Soil_2_P | 1.535         | 357       | 0.261155 |
| 48 096_SN01_Soil_1_P | 1.332         | 238       | 0.243409 |
| 49 096_SN01_Root_P   | 1.973         | 419       | 0.326771 |
| 096_SN08_Wick_P      | 2.03          | 452       | 0.332042 |
| 41 096_SN08_Soil_3_P | 1.835         | 347       | 0.313711 |
| 42 096_SN08_Soil_2_P | 0.023         | 489       | 0.003714 |
| 43 096_SN08_Soil_1_P | 1.964         | 452       | 0.321247 |
| 44 096_SN08_Root_P   | 1.804         | 283       | 0.31955  |
| 096_CFS_7_Swab       | 0.515         | 270       | 0.09199  |

Table S4. Shannon Index for Alpha Diversity for each sample recovered in VEG-03F.

Evenness is calculated by Pielou's Evenness Index. Community diversity includes richness (number of species) and evenness. Evenness is defined as how close in number each species is or another measure of biodiversity which quantifies how equal the community is numerically quantified. The range is from 0 to 1 where a value close to 0 means the numbers are uneven. The closer to 1 the numbers of each species are closer together.

| Sample                  | Veg 03F       |           |          |
|-------------------------|---------------|-----------|----------|
|                         | Shannon Index | # Species | Evenness |
| GMT_078_WG_Plant        | 0.333         | 129       | 0.068521 |
| 21 GMT_078_Outred_Plant | 0.411         | 91        | 0.091113 |
| GMT_099_9_Plant         | 0.344         | 92        | 0.076076 |
| 12 GMT_099_6_Plant      | 0.176         | 83        | 0.039829 |
| 13 GMT_099_15_Plant     | 0.397         | 71        | 0.093134 |
| 14 GMT_099_12_Plant     | 0.97          | 110       | 0.206362 |
| 099_SN09_Wick_P         | 0.956         | 404       | 0.159296 |
| 28 099_SN09_Soil_2_P    | 1.616         | 509       | 0.259288 |
| 29 099_SN09_Soil_1_P    | 1.647         | 378       | 0.277511 |
| 30 099_SN09_Root_P      | 1.781         | 372       | 0.300901 |
| 31 099_SN04_Wick_P      | 1.606         | 383       | 0.270005 |
| 32 099_SN04_Soil_3_P    | 1.471         | 338       | 0.252617 |
| 099_SN04_Soil_2_P       | 1.624         | 289       | 0.2866   |
| 34 099_SN04_Soil_1_P    | 1.553         | 464       | 0.252936 |
| 35 099_SN04_Root_P      | 1.809         | 397       | 0.302309 |
| 099_ML_2_Swab           | 1.242         | 176       | 0.24021  |
| 37 099_LL_3_Swab        | 1.381         | 266       | 0.247336 |
| 38 099_FAN_7_Swab       | 0.956         | 278       | 0.169876 |
| 39 099_BFU_5_Swab       | 0.343         | 138       | 0.069613 |

Table S5. Fungal genera determined by next generation sequencing using the ITS region. The list compiles plant, pillow and swab samples. VEG-03E/F were not de-multiplexed.

| Fungal Genera                   | VEG-03D | VEG-03E/F |
|---------------------------------|---------|-----------|
| <i>Alternaria spp</i>           | X       | X         |
| <i>Aspergillus spp</i>          | X       | X         |
| <i>Aureobasidium spp</i>        |         | X         |
| <i>Beauveria spp</i>            | X       | X         |
| <i>Capronia spp</i>             |         | X         |
| <i>Cryptococcus spp</i>         |         | X         |
| <i>Cylindrocladiella spp</i>    |         | X         |
| <i>Cystobasidium spp</i>        |         | X         |
| <i>Didymella spp</i>            |         | X         |
| <i>Epicoccum spp</i>            |         | X         |
| <i>Erythrobasidium spp</i>      |         | X         |
| <i>Exophiala spp</i>            |         | X         |
| <i>Falciformispora spp</i>      |         | X         |
| <i>Fusarium spp</i>             | X       | X         |
| <i>Gibberella spp</i>           | X       | X         |
| <i>Kabatiella spp</i>           |         | X         |
| <i>Kockovaella spp</i>          |         | X         |
| <i>Malassezia spp</i>           | X       | X         |
| <i>Microidium spp</i>           |         | X         |
| <i>Naganishia spp</i>           |         | X         |
| <i>Papiliotrema spp</i>         |         | X         |
| <i>Paramycosphaerella spp</i>   |         | X         |
| <i>Penicillium spp</i>          | X       | X         |
| <i>Podospora spp</i>            |         | X         |
| <i>Pomotodes spp</i>            | X       | X         |
| <i>Pseudoramichloridium spp</i> |         | X         |
| <i>Rhodosporidiobolus spp</i>   | X       | X         |
| <i>Rhodotorula spp</i>          | X       | X         |
| <i>Stagonosporopsis spp</i>     |         | X         |
| <i>Teratosphaeria spp</i>       |         | X         |
| <i>Trichoderma spp</i>          |         | X         |

Table S6. Adonis tables

| All Plants                                 | Df        | SumsOfSqs        | MeanSqs        | F.Model        | R2        | Pr(>F)           |
|--------------------------------------------|-----------|------------------|----------------|----------------|-----------|------------------|
| All Plant Types                            | 2         | 0.584            | 0.292          | 0.974          | 0.101     | 0.448            |
| TechDemo                                   | 2         | 2.287            | 1.144          | 3.813          | 0.397     | 0.001            |
| PlantType:TechDemo                         | 2         | 0.487            | 0.244          | 0.813          | 0.085     | 0.659            |
| Residuals                                  | 8         | 2.399            | 0.300          | NA             | 0.417     | NA               |
| Total                                      | 14        | 5.758            | NA             | NA             | 1.000     | NA               |
| <b>VEG-03D Mizuna Mustard Sample</b>       | <b>Df</b> | <b>SumsOfSqs</b> | <b>MeanSqs</b> | <b>F.Model</b> | <b>R2</b> | <b>Pr(&gt;F)</b> |
| Sample                                     | 3         | 1.662            | 0.554          | 38.349         | 0.975     | 0.01             |
| Residuals                                  | 3         | 0.043            | 0.014          | NA             | 0.025     | NA               |
| Total                                      | 6         | 1.705            | NA             | NA             | 1.000     | NA               |
| <b>VEG-03D Red Romaine Lettuce Sample</b>  | <b>Df</b> | <b>SumsOfSqs</b> | <b>MeanSqs</b> | <b>F.Model</b> | <b>R2</b> | <b>Pr(&gt;F)</b> |
| Sample                                     | 3         | 2.781            | 0.927          | 28.158         | 0.843     | 0.001            |
| Pillow                                     | 1         | 0.053            | 0.053          | 1.624          | 0.016     | 0.212            |
| Sample:Pillow                              | 3         | 0.267            | 0.089          | 2.705          | 0.081     | 0.085            |
| Residuals                                  | 6         | 0.198            | 0.033          | NA             | 0.060     | NA               |
| <b>VEG-03D Green Leaf Lettuce Sample</b>   | <b>Df</b> | <b>SumsOfSqs</b> | <b>MeanSqs</b> | <b>F.Model</b> | <b>R2</b> | <b>Pr(&gt;F)</b> |
| Sample                                     | 3         | 1.651            | 0.550          | 93.653         | 0.989     | 0.005            |
| Residuals                                  | 3         | 0.018            | 0.006          | NA             | 0.011     | NA               |
| Total                                      | 6         | 1.669            | NA             | NA             | 1.000     | NA               |
| <b>VEG-03E Mizuna Mustard Sample</b>       | <b>Df</b> | <b>SumsOfSqs</b> | <b>MeanSqs</b> | <b>F.Model</b> | <b>R2</b> | <b>Pr(&gt;F)</b> |
| Sample                                     | 3         | 1.817            | 0.606          | 12.829         | 0.636     | 0.002            |
| Pillow                                     | 1         | 0.254            | 0.254          | 5.388          | 0.089     | 0.004            |
| Sample:Pillow                              | 3         | 0.595            | 0.198          | 4.198          | 0.208     | 0.01             |
| Residuals                                  | 4         | 0.189            | 0.047          | NA             | 0.066     | NA               |
| Total                                      | 11        | 2.855            | NA             | NA             | 1.000     | NA               |
| <b>VEG-03F Red Romaine Lettuce Samples</b> | <b>Df</b> | <b>SumsOfSqs</b> | <b>MeanSqs</b> | <b>F.Model</b> | <b>R2</b> | <b>Pr(&gt;F)</b> |
| Sample                                     | 3         | 1.584            | 0.528          | 17.330         | 0.775     | 0.003            |
| Pillow                                     | 1         | 0.164            | 0.164          | 5.391          | 0.080     | 0.035            |
| Sample:Pillow                              | 2         | 0.204            | 0.102          | 3.344          | 0.100     | 0.105            |
| Residuals                                  | 3         | 0.091            | 0.030          | NA             | 0.045     | NA               |
| Total                                      | 9         | 2.044            | NA             | NA             | 1.000     | NA               |

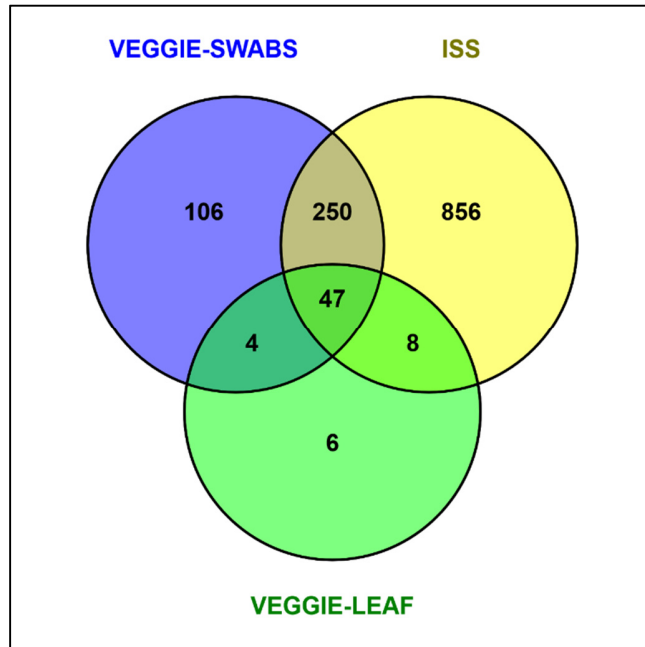

Figure S2. Comparison of bacterial genera from Veggie facility swabs, Veggie leaf samples and a data set from ISS surface and crew samples (reported by Avila-Herrera et al., 2020).
